# Supplementary material for: Single wavelength excited multi-channel nanoMOF sensor for simultaneous and ratiometric imaging of intracellular pH and O2
Source: Royal Society of Chemistry journal article supplement (doi:10.1039/c9tc06624a), 2020-01-01
Supplement: c9tc06624a1.pdf [file c9tc06624a1.pdf]

## Supporting Information

Single wavelength excited multi-channel nanoMOFs  
sensor for simultaneous and ratiometric imaging of  
intracellular pH and O<sub>2</sub>

Liwei Zhao,<sup>a,b</sup> Jian Yang,<sup>\*,a,b</sup> Ming Gong,<sup>a,b</sup> Yiwen Zhang,<sup>\*,c</sup> and Jinlou Gu<sup>\*,a,b</sup>

<sup>a</sup>Shanghai Engineering Research Center of Hierarchical Nanomaterials and <sup>b</sup>Key  
Laboratory for Ultrafine Materials of Ministry of Education, School of Materials  
Science and Engineering, East China University of Science and Technology, Shanghai  
200237, China

<sup>c</sup>Mathematics and Science College, Shanghai Normal University, Shanghai, 200234,  
China

**E-mail:** [jinloug@ecust.edu.cn](mailto:jinloug@ecust.edu.cn)

Fax: +86-21-64250740; Tel: +86-21-64252599

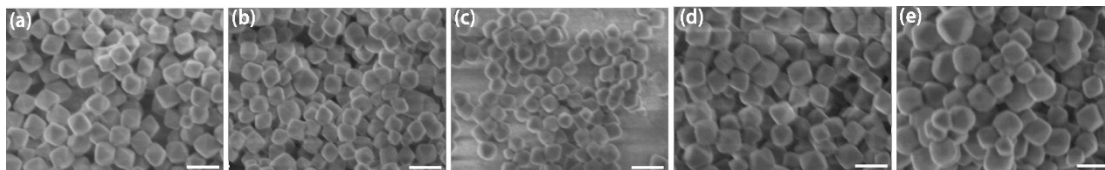

Fig. S1 SEM images of FITC@UiO-66 with different feed ratios of FITC to BDC. The feed ratios were set as (a) 0.006 : 1, (b) 0.012 : 1, (c) 0.024 : 1, (d) 0.048 : 1 and (e) 0.096 : 1 (scale bar: 200 nm).

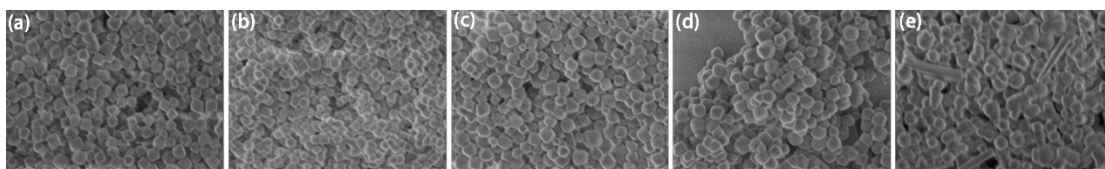

Fig. S2 SEM images of Pt-TCPP@UiO-66 with different feed ratios of Pt-TCPP to BDC. The feed ratios were set as (a) 0.01 : 1, (b) 0.03 : 1, (c) 0.06 : 1, (d) 0.10 : 1 and (e) 0.12 : 1 (scale bar: 200 nm).

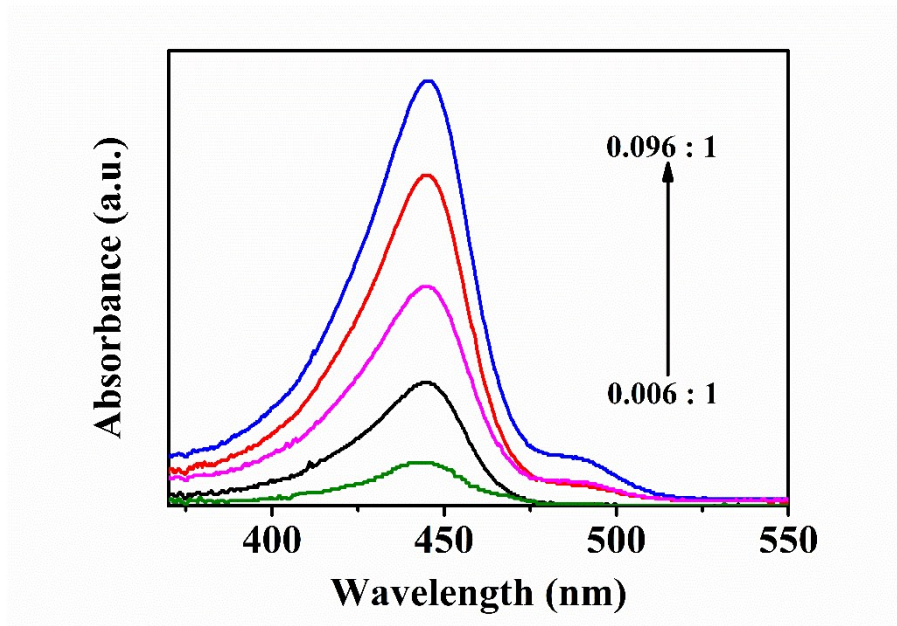

Fig. S3 UV-vis absorption spectra of the FITC@UiO-66 with the FITC to BDC feed ratios ranging from 0.006 : 1 to 0.096 : 1.

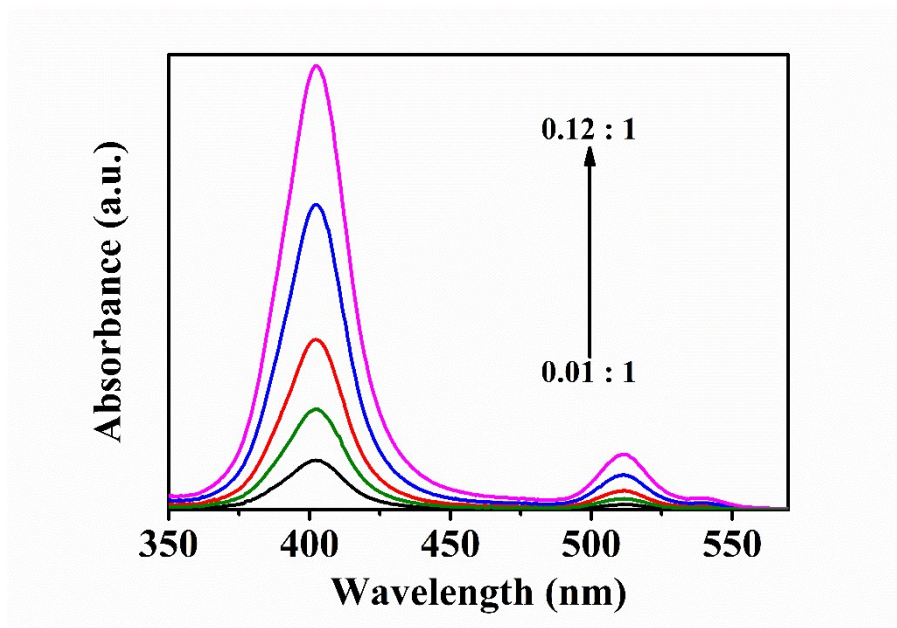

Fig. S4 UV-vis absorption spectra of the Pt-TCPP@UiO-66 with the Pt-TCPP to BDC feed ratios ranging from 0.01 : 1 to 0.12 : 1.

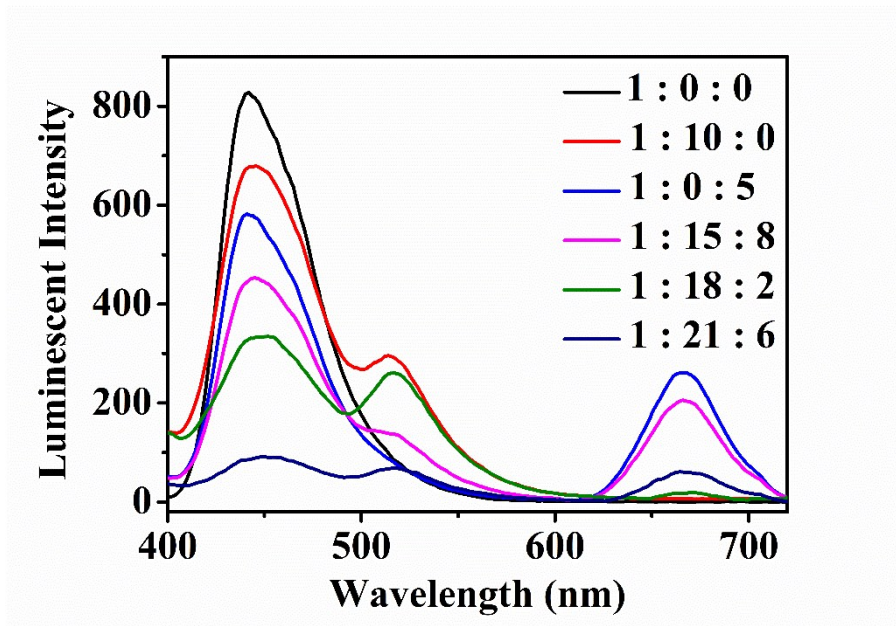

Fig. S5 The emission spectra of the TBAPY/FITC/Pt-TCPP@UiO-66 with various feed ratios of TBAPY : FITC : Pt-TCPP. The excitation wavelength is 385 nm.

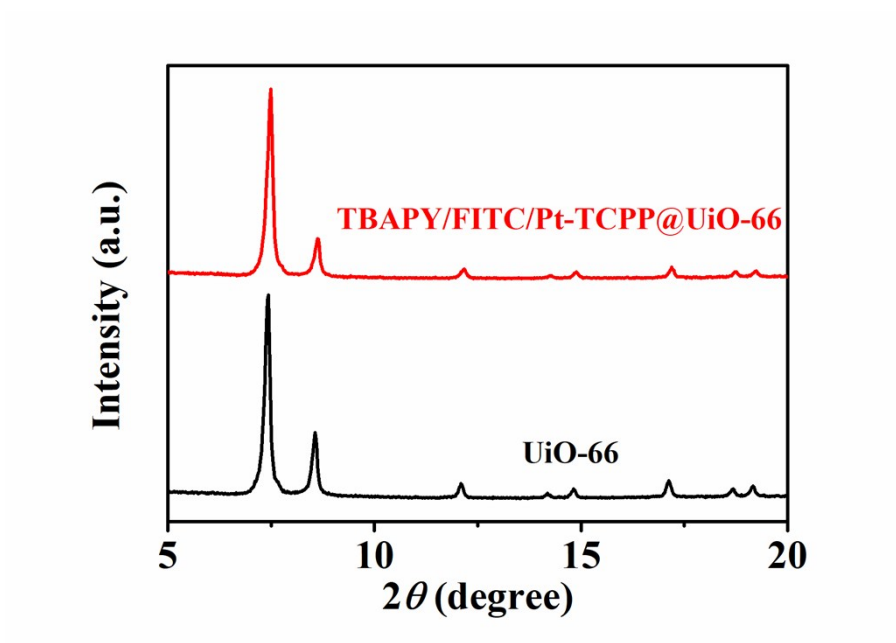

Fig. S6 XRD patterns of the synthesized UiO-66 and TBAPY/FITC/Pt-TCPP@UiO-66.

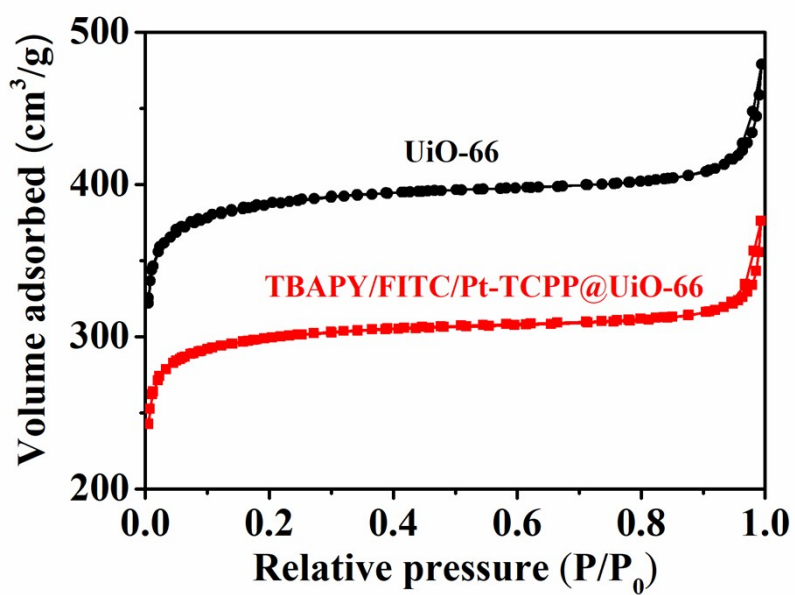

Fig. S7 N<sub>2</sub> sorption isotherms of the synthesized UiO-66 and TBAPY/FITC/Pt-TCPP@UiO-66 samples.

Table S1 Textural parameters of the synthesized UiO-66 and TBAPY/FITC/Pt-TCPP@UiO-66.

| Samples                   | $S_{\text{BET}}$ ( $\text{m}^2 \text{g}^{-1}$ ) | $V$ ( $\text{cm}^3 \text{g}^{-1}$ ) |
|---------------------------|-------------------------------------------------|-------------------------------------|
| Pure UiO-66               | 1494                                            | 0.52                                |
| TBAPY/FITC/Pt-TCPP@UiO-66 | 1156                                            | 0.39                                |

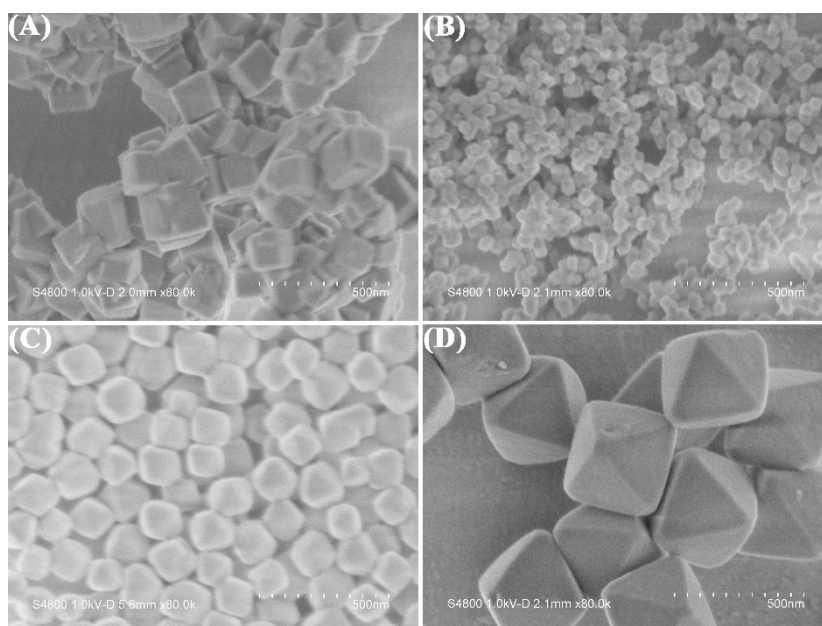

Fig. S8 SEM images of the TBAPY/FITC/Pt-TCPP@UiO-66 NPs synthesized with BA to BDC feed ratios of (A) 0 : 1, (B) 5 : 1, (C) 10 : 1 and (D) 20 : 1 to demonstrate the morphology evolution.

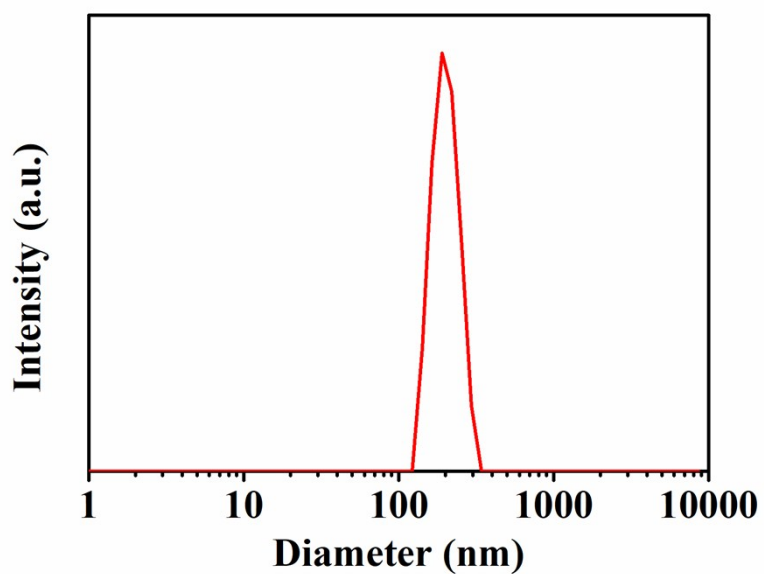

Fig. S9 The DLS profile of the synthesized TBAPY/FITC/Pt-TCPP@UiO-66 dispersed in aqueous phase.

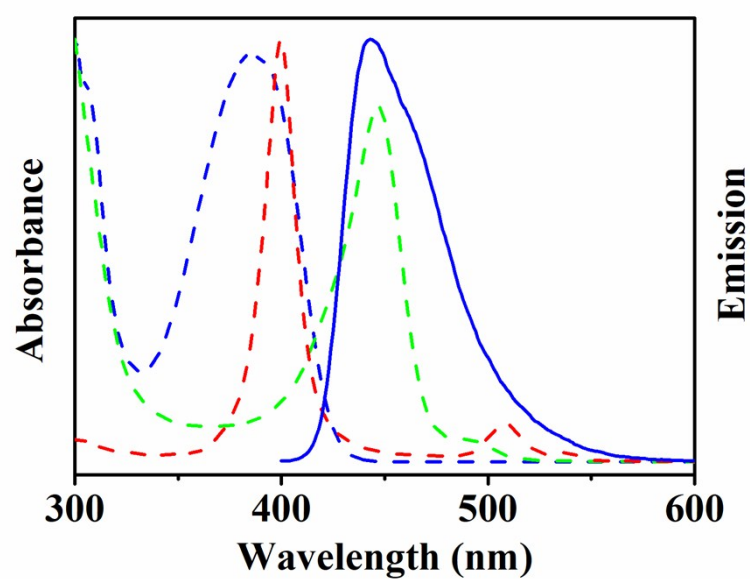

Fig. S10 UV-Vis absorption spectra of Pt-TCPP (dashed red line), FITC (dashed green line) and TBAPY (dashed blue line); and emission spectrum of the TBAPY (solid blue line).

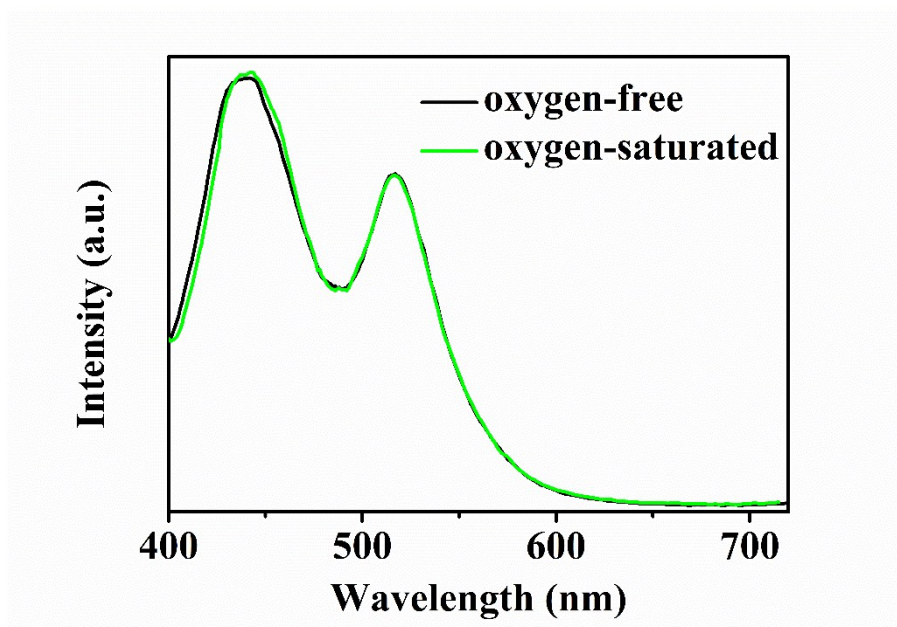

Fig. S11 The emission spectra of the synthesized TBAPY/FITC@UiO-66 under different oxygen concentrations.

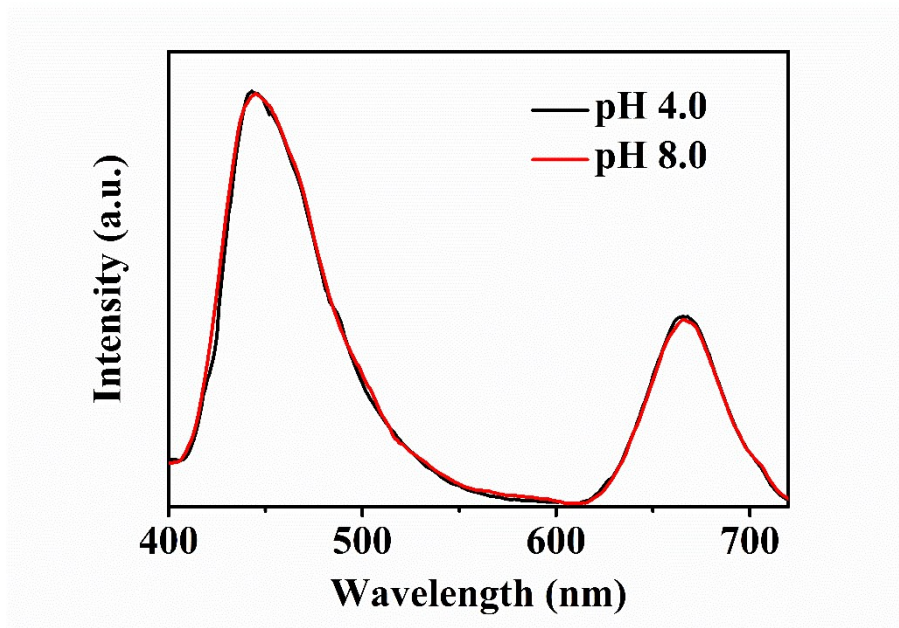

Fig. S12 The emission spectra of the synthesized TBAPY/Pt-TCPP@UiO-66 under different pH conditions.

The limit of detection (LOD) of nanoprobe for pH detection was calculated by the formula of  $LOD = 3 \sigma / k$ .

$$\begin{aligned}
 \text{Detection Limit} &= 3\sigma/k \\
 &= 3 \times 1.22 / 79.8 \\
 &= 0.0459
 \end{aligned}$$

The luminescence spectra of TBAPY/FITC/Pt-TCPP@UiO-66 probe at pH = 7 were recorded for 6 times. The standard deviation  $\sigma$  of the sample was calculated to be 1.22.

The slope  $k$  is obtained by fitting a linear relationship between the luminescent intensity of the sample at 515 nm and pH.



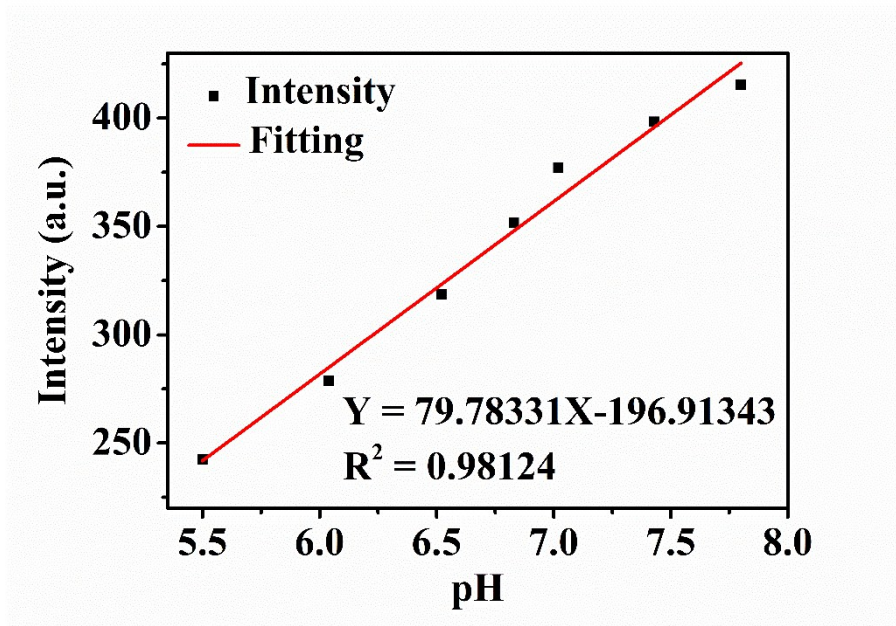

Fig. S13 The relationship between the luminescent intensity of TBAPY/FITC/Pt-TCPP@UiO-66 probe at 515 nm and pH, and its linear fitting curve are used to estimate the LOD at a DO concentration of 7 mg/L.

Table S2 Comparison of the sensing performances between TBAPY/FITC/Pt-TCPP@UiO-66 and the reported pH sensors.

| Matrix | Formation                        | Response range | LOD    | Ref.      |
|--------|----------------------------------|----------------|--------|-----------|
|        | TBAPY/FITC/Pt-TCPP@UiO-66        | pH 4.51-8.21   | 0.0459 | This work |
| MOFs   | FITC@F-UiO NMOFs                 | pH 4-8         | /      | [1]       |
|        | Tb-MOF                           | pH 2-7         | /      | [2]       |
|        | UiO-66-N=N-ind <sub>3h</sub>     | pH 1-12        | /      | [3]       |
|        | UPC-5                            | pH 7.5-10.0    | /      | [4]       |
| Others | FITC@Semiconducting Polymer Dots | pH 5-8         | /      | [5]       |
|        | FITC@Polymer Sensor Film         | pH 3-8         | /      | [6]       |
|        | FITC@SiO <sub>2</sub> @QD        | pH 5.56-7.86   | /      | [7]       |
|        | FITC@Core/shell Nanosensors      | pH 3-9         | /      | [8]       |
|        | FITC@Chitosan Film               | pH 4-8         | /      | [9]       |
|        | FITC@Semiconducting Polymer Dots | pH 4.08-9.01   | /      | [10]      |

The limit of detection (LOD) of nanoprobe for O<sub>2</sub> detection was calculated by the formula of  $LOD = 3 \sigma / k$ .

$$\begin{aligned} \text{Detection Limit} &= 3\sigma/k \\ &= 3 \times 1.24 / 28.3 \\ &= 0.1314 \text{ mg/L} \end{aligned}$$

The luminescence spectra of TBAPY/FITC/Pt-TCPP@UiO-66 probe at DO = 7 mg/L were recorded for 6 times. The standard deviation  $\sigma$  of the sample was calculated to be 1.24. The slope  $k$  is obtained by fitting a linear relationship between the luminescent intensity of the sample at 668 nm and DO.

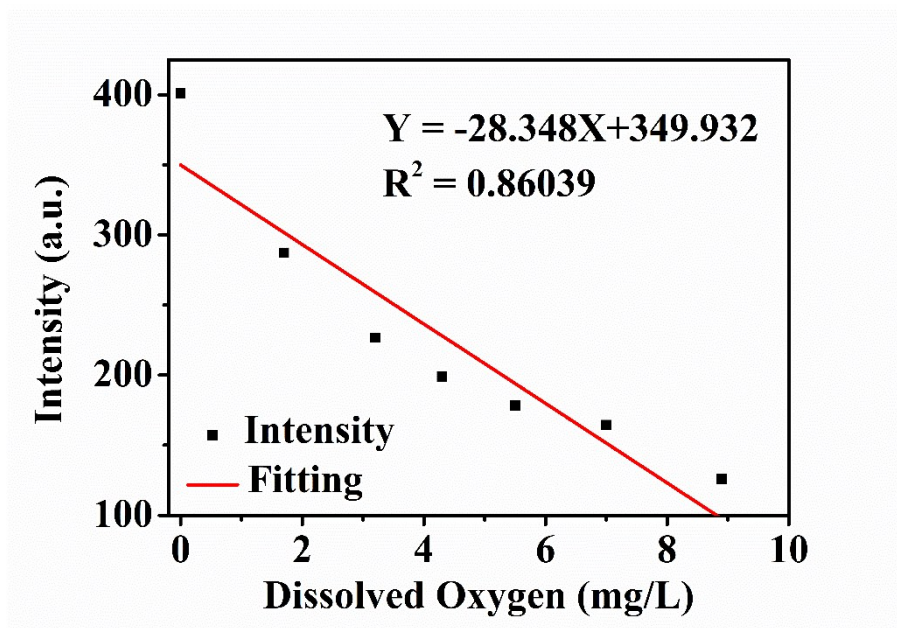

Fig. S14 The relationship between the luminescent intensity of TBAPY/FITC/Pt-TCPP@UiO-66 probe at 668 nm and DO, and its linear fitting curve are used to estimate the LOD in aqueous phase at pH = 6.9.

Table. S3 Comparison of the sensing performances between TBAPY/FITC/Pt-TCPP@UiO-66 and the reported O<sub>2</sub> sensors.

| Matrix | Formation                                       | Response range  | LOD         | Ref.      |
|--------|-------------------------------------------------|-----------------|-------------|-----------|
|        | TBAPY/FITC/Pt-TCPP@UiO-66                       | 0-30 mg/L       | 0.1314 mg/L | This work |
| MOFs   | R-UiO NMOFs                                     | 0-80 mmHg       | /           | [11]      |
|        | PCN-224(Pt)                                     | 0-731 $\mu$ M   | /           | [12]      |
|        | UiO-67                                          | 0.001-0.026 atm | /           | [13]      |
|        | MIL-100(In) $\Rightarrow$ Tb <sup>3+</sup> Film | 0 -1 atm        | /           | [14]      |
|        | Pt-TCPP@Films onto Alumina Plates               | 0-100%          | /           | [15]      |
|        | Pt-TPP Polymer                                  | 4.3-38.6 mg/L   | 0.06 mg/L   | [16]      |
| Others | Pt-TCPP@Fluoropolymer Film                      | 0-100%          | /           | [17]      |
|        | Pt-FTPP                                         | 0-15.5 mg/L     | 0.01 mg/L   | [18]      |
|        | PtOEP Film                                      | 0-40 mg/L       | /           | [19]      |

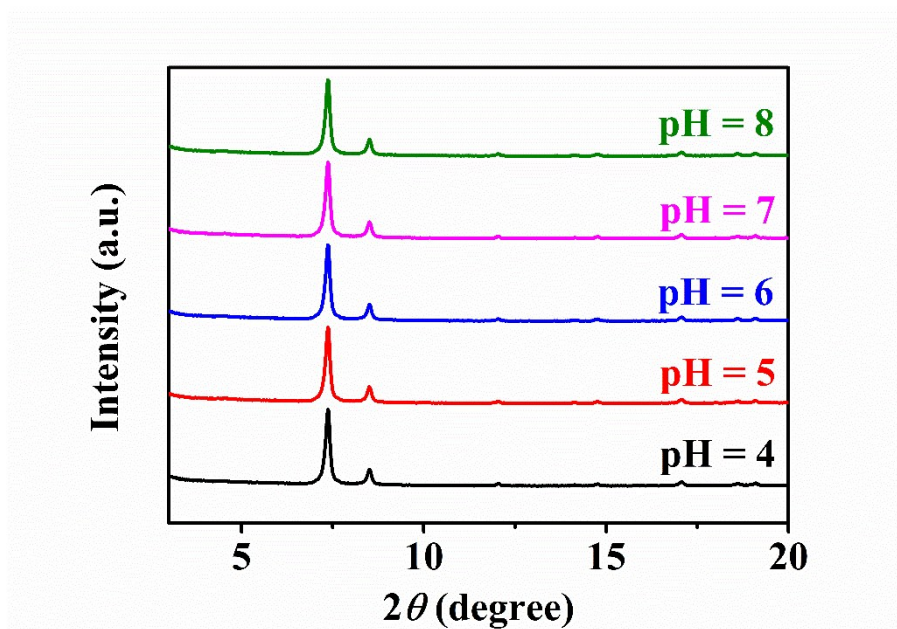

Fig. S15 XRD patterns of the TBAPY/FITC/Pt-TCPP@UiO-66 after soaking and keeping in a buffer solution of different pH for 24 h.

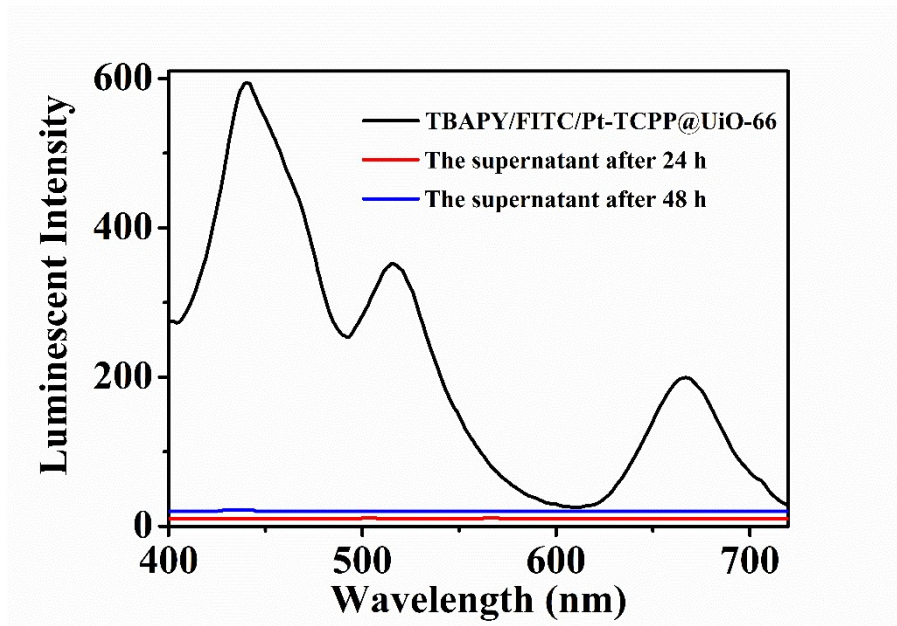

Fig. S16 Luminescent spectra of the synthesized nanoprobe and the supernatant isolated from the nanoprobe aqueous suspension after 24 and 48 h.

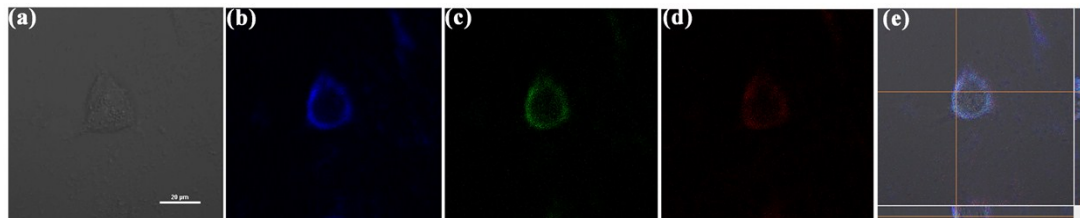

Fig. S17. Luminescent images of HeLa cells treated with the TBAPY/FITC/Pt-TCPP@UiO-66 (pH = 7.4, DO = 8mg/L): (a) bright field image, (b) blue channel image, (c) green channel image, (d) red channel image, (e) orthogonal projection of the z-stack reconstructions of consecutive focal planes image.

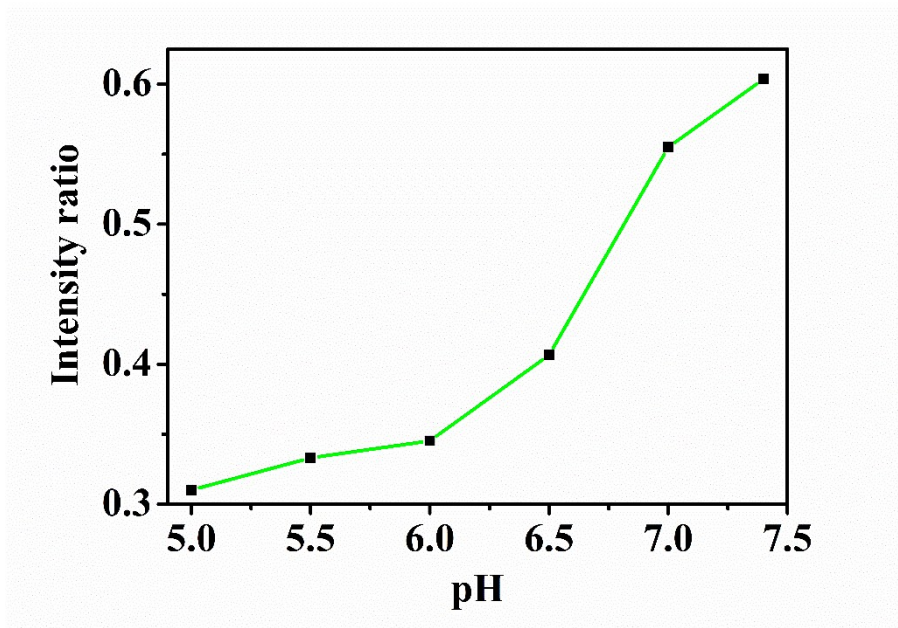

Fig. S18 Calibration curve of the intensity ratio of green/blue channels for TBAPY/FITC/Pt-TCPP@UiO-66 sensor in the pseudo color images under different pH values.

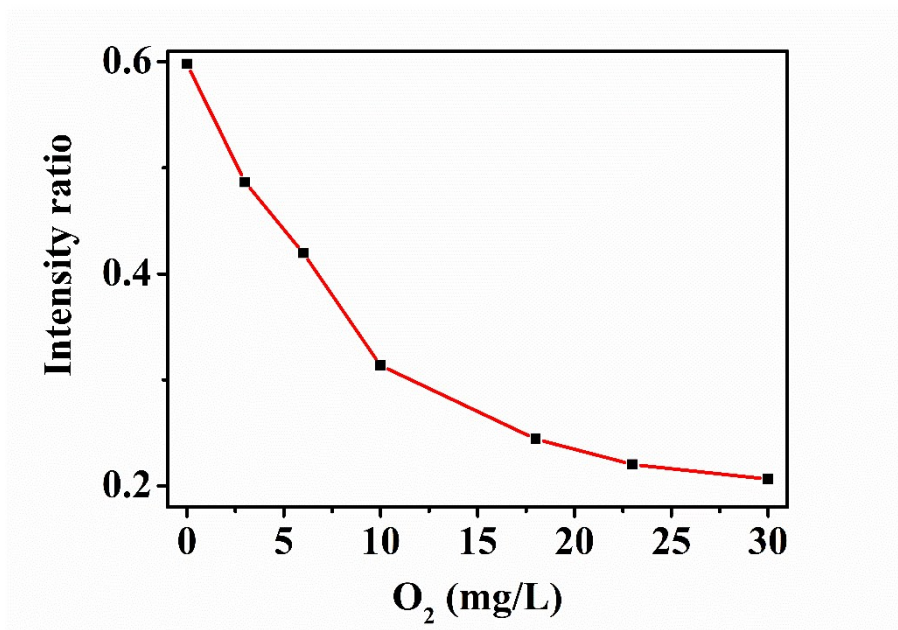

Fig. S19 Calibration curve of the intensity ratio of red/blue channels for TBAPY/FITC/Pt-TCPP@UiO-66 sensor in the pseudo color images under different concentrations of oxygen.

## Notes and references

- 1 C. He, K. Lu and W. Lin, *J. Am. Chem. Soc.*, 2014, **136**, 12253.
- 2 H.-Y. Li, Y.-L. Wei, X.-Y. Dong, S.-Q. Zang and T. C. W. Mak, *Chem. Mater.*, 2015, **27**, 1327.
- 3 J. Aguilera-Sigalat and D. Bradshaw, *Chem. Commun.*, 2014, **50**, 4711.
- 4 Qingguo Meng, Xuelian Xin, Liangliang Zhang, Fangna Dai, Rongming Wang and Daofeng Sun, *J. Name.*, 2013, **00**, 1.
- 5 Y.-H. Chan, C. Wu, F. Ye, Y. Jin, P. B. Smith and D. T. Chiu, *Anal. Chem.*, 2011, **83**, 1448.
- 6 R. J. Meier, S. Schreml, X.-D. Wang, M. Landthaler, P. Babilas, and O. S. Wolfbeis, *Angew. Chem.*, 2011, **123**, 11085.
- 7 H. Huang, F. Dong and Y. Tian, *Anal. Chem.*, 2016, **88**, 12294.
- 8 X.-D. Wang, J. A. Stolwijk, T. Lang, M. Sperber, R. J. Meier, J. Wegener and O. S. Wolfbeis, *J. Am. Chem. Soc.*, 2012, **134**, 17011.
- 9 W. Xu, S. Lu, Y. Chen, T. Zhao, Y. Jiang, Y. Wang, X. Chen, *Sensor. Actuat. B-Chem.*, 2015, **220**, 326.
- 10 W. Xu, S. Lu, M. Xu, Y. Jiang, Y. Wang and X. Chen, *J. Mater. Chem. B*, 2016, **4**, 292.
- 11 R. Xu, Y. Wang, X. Duan, K. Lu, D. Micheroni, A. Hu and W. Lin, *J. Am. Chem. Soc.*, 2016, **138**, 2158.
- 12 J. Yang, Z. Wang, Y. Li, Q. Zhuang, and J. Gu, *Chem. Mater.*, 2016, **28**, 2652.
- 13 S. M. Barrett, C. Wang and W. Lin, *J. Mater. Chem.*, 2012, **22**, 10329.
- 14 Z. Dou, J. Yu, Y. Cui, Y. Yang, Z. Wang, D. Yang and G. Qian, *J. Am. Chem. Soc.*, 2014, 136, **15**, 5527.
- 15 Y. Amao and I. Okura, *Analyst*, 2000, **125**, 1601.
- 16 A. S. Holmes-Smith, A. Hamill, M. Campbell and M. Uttamlal, *Analyst*, 1999, **124**, 1463.
- 17 Y. Amao, K. Asai, T. Miyashita and I. Okura, *Polym. Adv. Technol.*, 2000, **11**, 705.
- 18 Y. Zhao, T. Ye, H. Chen, D. Huang, T. Zhou, C. He and X. Chen, *Luminescence*, 2011, **26**, 29.
- 19 R.N. Gillanders, M.C. Tedford, P.J. Crilly, R.T. Bailey, *Analytica Chimica Acta*, 2004, **502**, 1.
